# Supplementary material for: Rabaptin5 targets autophagy to damaged endosomes and Salmonella vacuoles via FIP200 and ATG16L1
Source: PubMed Central journal article supplement — EMBO Rep. 2021 Oct 26;23(1):e53429. doi: 10.15252/embr.202153429 (PMC8728625; doi:10.15252/embr.202153429), 2021-10-26
Supplement: EMBR-23-e53429-s001.pdf [file EMBR-23-e53429-s001.pdf]

## Expanded View Figures

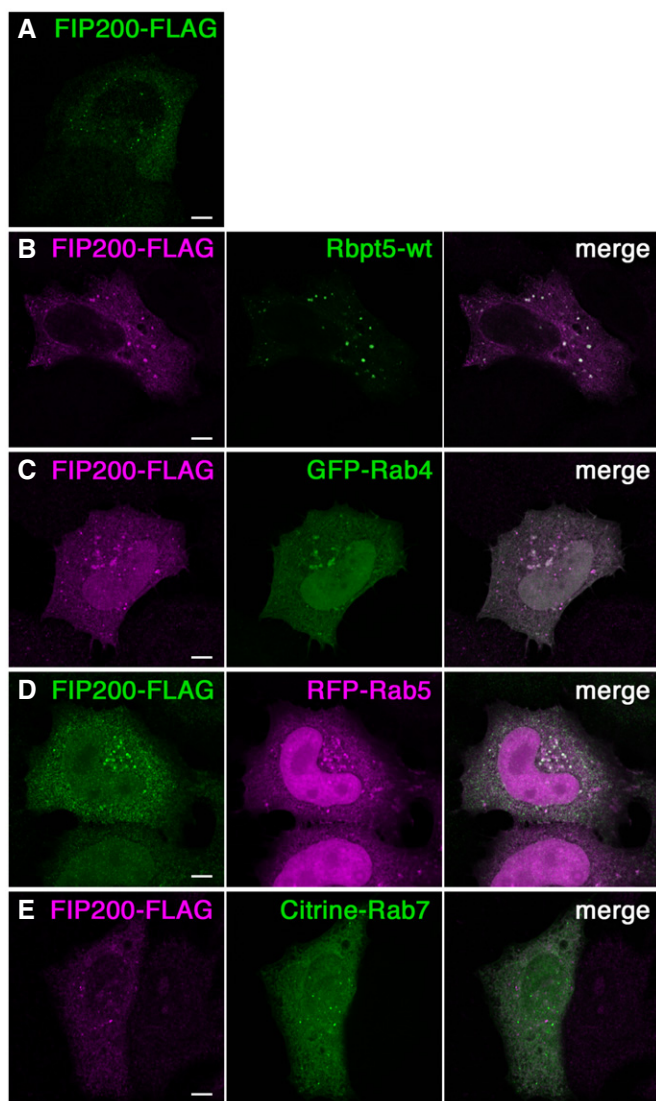**Figure EV1. FIP200 colocalizes with endosomal markers.**

A–E HeLa cells were transfected with FLAG-tagged FIP200 alone (A) or together with Rabaptin5 (Rbpt5-wt) (B), GFP-Rab4 (C), RFP-Rab5 (D), or Citrine-Rab7 (E), fixed after 24 h, and subjected to immunofluorescence microscopy. Scale bar, 10  $\mu$ m.

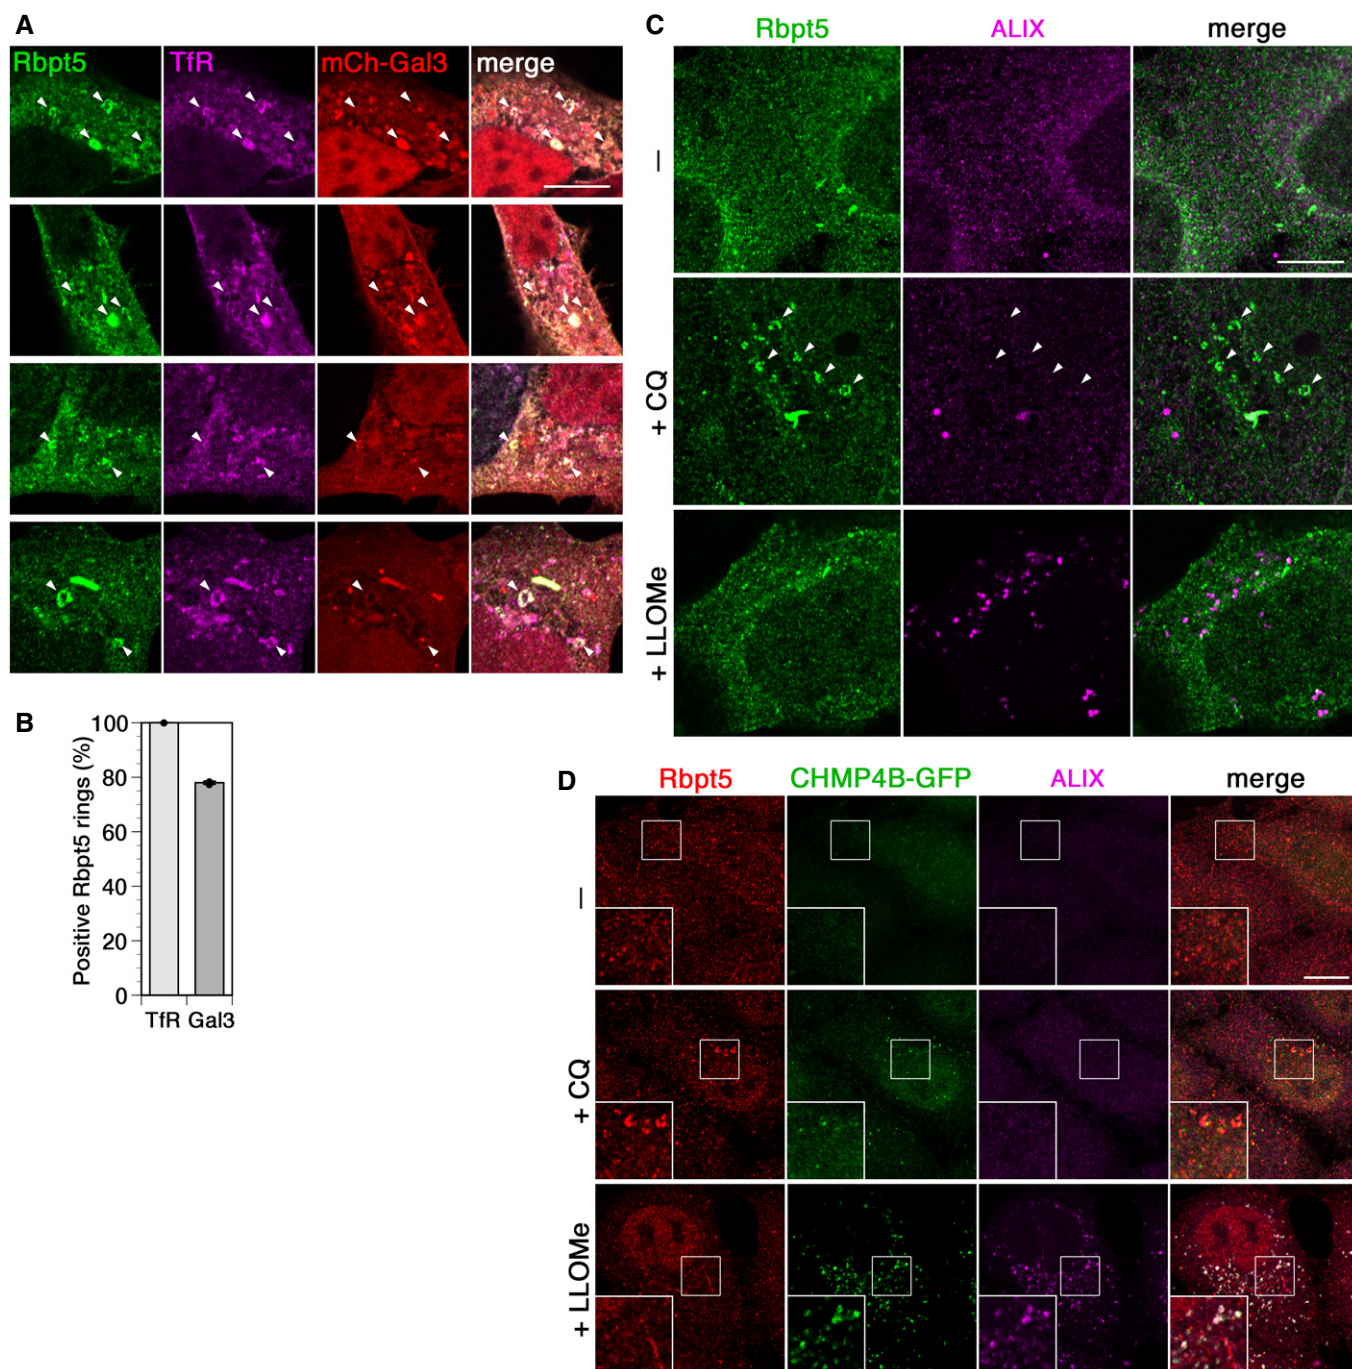

**Figure EV2. Chloroquine damages transferrin receptor- and Galectin 3-positive early endosomes without recruiting ESCRT components.**

- A HEK<sup>+Rbpt5</sup> cells transfected with mCherry-galactin 3 (mCh-Gal3) were treated with 60  $\mu$ M chloroquine for 30 min and analyzed by immunofluorescence microscopy for Rabaptin5, transferrin receptor (TfR), and mCherry-galactin 3. Arrowheads point out swollen Rabaptin5-positive endosomes. Scale bar, 10  $\mu$ m.
- B Cells from experiments as in panel A were quantified for costaining of Rabaptin5-positive rings with transferrin receptor and galectin 3 (mean  $\pm$  SD of three independent experiments counting > 50 rings each).
- C HEK<sup>+Rbpt5</sup> cells were treated without (-) or with 60  $\mu$ M chloroquine (+CQ) or 1 mM LLOMe (+LLOMe) for 30 min and analyzed by immunofluorescence microscopy for Rabaptin5 and ALIX. Arrowheads point out swollen Rabaptin5-positive endosomes. Scale bar, 10  $\mu$ m.
- D HeLa cells stably expressing CHMP4B-GFP were treated as in panel C and analyzed for Rabaptin5, CHMP4B-GFP, and ALIX. Scale bar, 10  $\mu$ m.

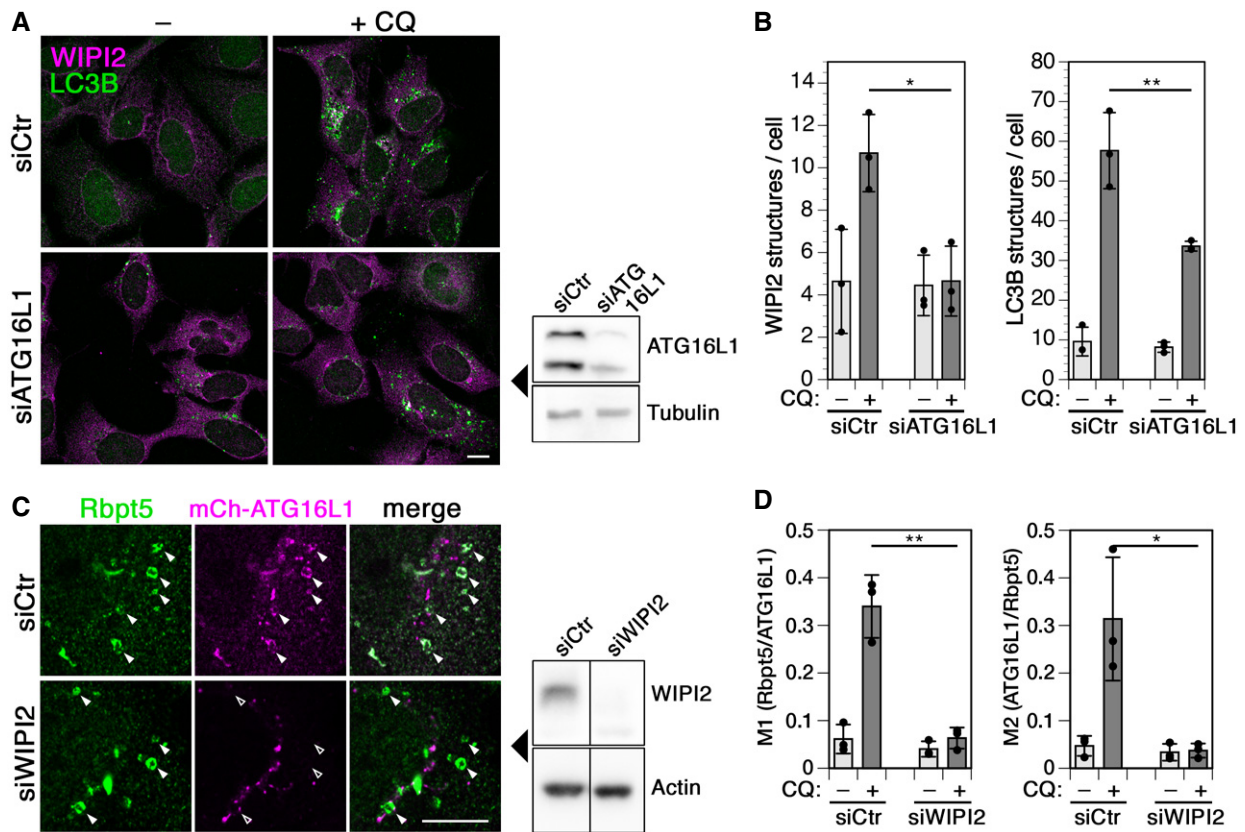

**Figure EV3. Interdependence of WIPI2 and ATG16L1 recruitment to chloroquine-damaged endosomes.**

- A, B Cells were transfected with control siRNA (siCtrl) or siRNA silencing ATG16L1, treated without (-) or with 60  $\mu$ M chloroquine (+CQ) for 150 min, fixed, and stained for WIPI2 and LC3B (A). Scale bar, 10  $\mu$ m. Efficiency of ATG16L1 knockdown was assayed by immunoblotting on the right. WIPI2 of LC3B puncta per cell was quantified for each condition (mean  $\pm$  SD of three independent experiments; two-tailed Student's *t*-test: \**P* < 0.05, \*\**P* < 0.01).
- C HEK<sup>+Rbpt5</sup> cells were transfected with nontargeting siRNA (siCtrl) or siRNAs silencing WIPI2 (siWIPI2) for 72 h and with mCherry-ATG16L1 for 24 h. Cells were treated without or with 60  $\mu$ M chloroquine (+CQ) for 30 min and stained for Rabaptin5 and mCherry-ATG16L1. Fluorescence micrographs of chloroquine-treated cells are shown (left panel). Scale bar, 10  $\mu$ m. Arrowheads point out chloroquine-induced enlarged early endosomes. The efficiency of WIPI2 knockdown was assayed by immunoblotting using actin as a loading control (middle panel).
- D Manders' colocalization coefficients were determined, M1 showing the fraction of Rabaptin5-positive structures also positive for mCherry-ATG16L1 and M2 showing the inverse. Mean  $\pm$  SD of three independent experiments; ANOVA: \**P* < 0.05, \*\**P* < 0.01.

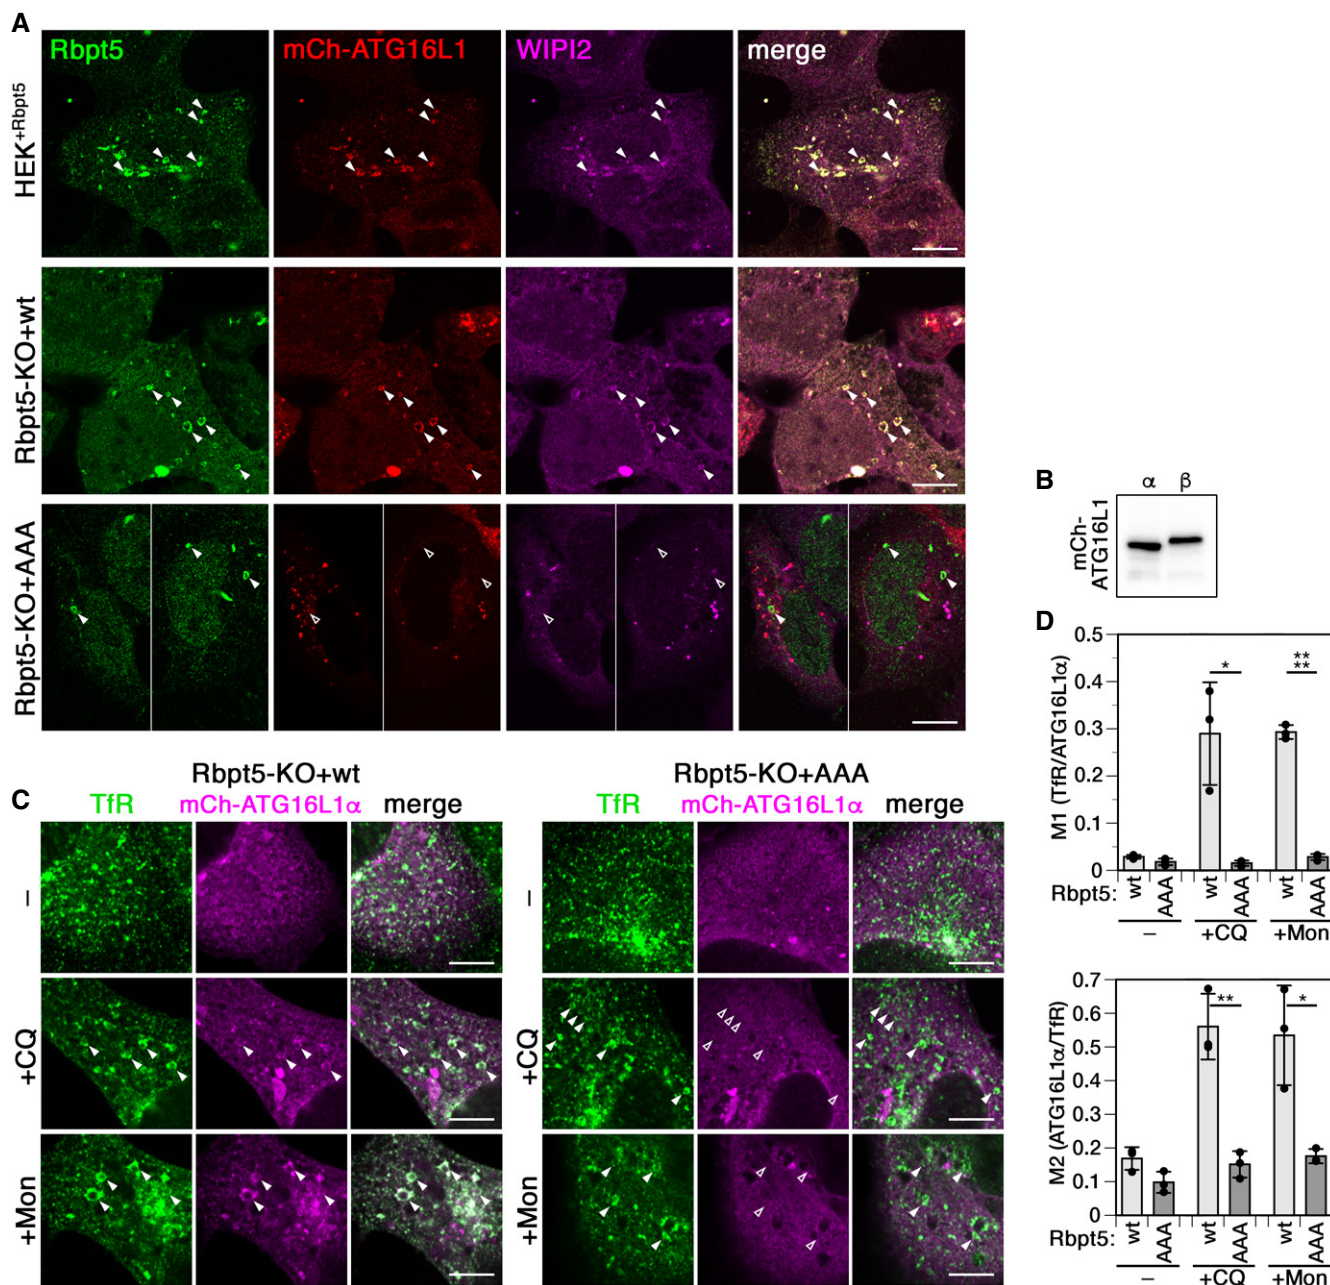

**Figure EV4. Recruitment of full-length ATG16L1 and ATG16L1 $\alpha$  to damaged endosomes depends on the interaction motif in Rabaptin5.**

**A** HEK<sup>Rbpt5</sup> cells and Rabaptin5-knockout cells stably re-expressing wild-type (Rbpt5-KO+wt) or AAA mutant Rabaptin5 (Rbpt5-KO+AAA) were transfected with mCherry-ATG16L1, treated with 60  $\mu$ M chloroquine (CQ) for 30 min, and analyzed by immunofluorescence microscopy for Rabaptin5, mCherry-ATG16L1, and WIPI2. Manders' colocalization coefficients determined from these experiments are shown in Fig 6F and G. Scale bar, 10  $\mu$ m. Arrowheads point out enlarged Rabaptin5-positive endosomes (empty arrowheads when negative for the stained protein).

**B** HEK293A cells were transfected with the mCherry-tagged full-length  $\beta$  isoform of ATG16L1 or the  $\alpha$  isoform lacking residues 266–284 and analyzed by immunoblot analysis.

**C** Rabaptin5-knockout cells stably re-expressing wild-type (Rbpt5-KO+wt) or AAA mutant Rabaptin5 (Rbpt5-KO+AAA) were transfected with mCherry-ATG16L1 $\alpha$ , treated without (–) or with 60  $\mu$ M chloroquine (+CQ) or 100  $\mu$ M monensin (+Mon) for 30 min, and analyzed by immunofluorescence microscopy for the transferrin receptor (TfR) and mCherry-ATG16L1 $\alpha$ . Arrowheads point out chloroquine-induced enlarged early endosomes. Scale bar, 10  $\mu$ m. Arrowheads point out enlarged Rabaptin5-positive endosomes (empty arrowheads when negative for the stained protein).

**D** From experiments as in panel C, Manders' colocalization coefficients were determined, M1 showing the fraction of transferrin receptor-positive structures also positive for mCherry-ATG16L1 $\alpha$  and M2 showing the inverse (mean  $\pm$  SD of three independent experiments; two-tailed Student's *t*-test: \**P* < 0.05, \*\**P* < 0.01, \*\*\*\**P* < 0.0001).

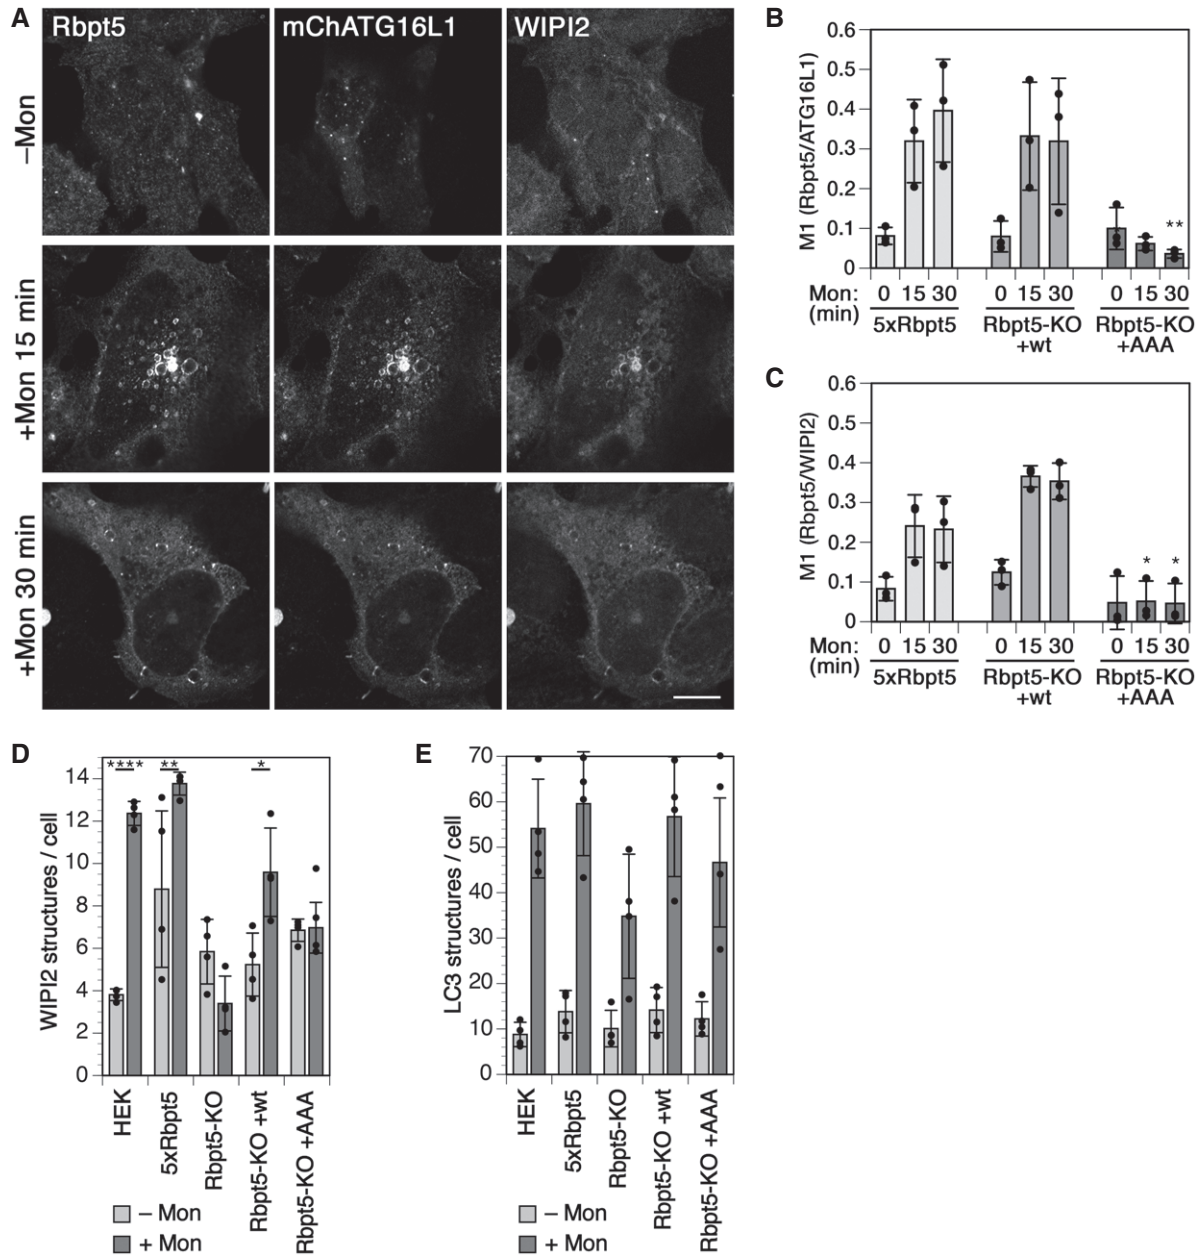

**Figure EV5. Monensin induces endosomal autophagy dependent on Rabaptin5 and ATG16L1-binding just like chloroquine.**

- A HEK<sup>+Rbpt5</sup> cells, 24 h after transfection with mCherry-ATG16L1, were treated with 100  $\mu$ M monensin for 0, 15, and 30 min and stained for Rabaptin5, WIPI2, and mCherry-ATG16L1 to assess their colocalization on swollen early endosomes. Scale bar, 10  $\mu$ m.
- B, C Manders' colocalization coefficients were determined, showing the fraction of Rabaptin5-positive structures also positive for mCherry-ATG16L1 (B) or for WIPI2 (C) (mean  $\pm$  SD of three independent experiments, quantifying ~40 cells for each sample; ANOVA for Rbpt5-KO+AAA versus HEK<sup>+Rbpt5</sup> cells: \* $P$  < 0.05, \*\* $P$  < 0.01).
- D, E Wild-type HEK293A cells, HEK<sup>+Rbpt5</sup> cells, and Rabaptin5-knockout cells without (Rbpt5-KO) or with stable re-expression of wild-type (Rbpt5-KO+wt) or AAA mutant Rabaptin5 (Rbpt5-KO+AAA) were treated without (-Mon) or with 100  $\mu$ M monensin for 150 min (+Mon), and analyzed by immunofluorescence microscopy for WIPI2 or LC3B. WIPI2 (D) or LC3B (E) puncta per cell were quantified for each condition (mean  $\pm$  SD of four independent experiments; ANOVA: \* $P$  < 0.05, \*\* $P$  < 0.01, \*\*\*\* $P$  < 0.0001).
