# Supplementary material for: Rabaptin5 targets autophagy to damaged endosomes and Salmonella vacuoles via FIP200 and ATG16L1
Source: PubMed Central journal article supplement — EMBO Rep. 2021 Oct 26;23(1):e53429. doi: 10.15252/embr.202153429 (PMC8728625; doi:10.15252/embr.202153429), 2021-10-26
Supplement: EMBR-23-e53429-s003.pdf [file EMBR-23-e53429-s003.pdf]

## APPENDIX

### Rabaptin5 targets autophagy to damaged endosomes and Salmonella vacuoles via FIP200 and ATG16L1

Valentina Millarte, Simon Schlienger, Simone Kälin, and Martin Spiess\*

#### Table of Contents

|                            |                                                                                                                            |   |
|----------------------------|----------------------------------------------------------------------------------------------------------------------------|---|
| <b>Appendix Table S1.</b>  | Rabaptin5 interactors identified by yeast two-hybrid screen. ....                                                          | 2 |
| <b>Appendix Figure S1.</b> | ULK1 knockdown inhibits starvation-induced autophagy. ....                                                                 | 3 |
| <b>Appendix Figure S2.</b> | Silencing of ATG13 or inhibition of ULK1/2 blocks recruitment of ATG16L1 to Rabaptin5-positive endosomes. ....             | 4 |
| <b>Appendix Figure S3.</b> | Chloroquine-induced autophagy involves galectin3 and p62 and is independent of BafA1. ....                                 | 5 |
| <b>Appendix Figure S4.</b> | ATG16L1 recruitment to chloroquine-damaged endosomes requires FIP200. ....                                                 | 7 |
| <b>Appendix Figure S5.</b> | Deletion of the WD domain in ATG16L1 and the AAA mutation in Rabaptin5 do not abrogate their interaction with FIP200. .... | 8 |
| <b>Appendix Figure S6.</b> | Inactivation of Rabaptin5 does not affect autophagic flux, but chloroquine-induced transferrin receptor degradation. ....  | 9 |

**Appendix Table S1. Rabaptin5 interactors identified by yeast two-hybrid screen.**

| Interaction quality* | Gene name     | Protein                                | Interacting fragment |
|----------------------|---------------|----------------------------------------|----------------------|
| A                    | RABEP1        | Rabaptin5                              | 579–691              |
| <b>A</b>             | <b>RB1CC1</b> | <b>FIP200</b>                          | <b>281–439</b>       |
| A                    | VIM           | Vimentin                               | 15–144               |
| B                    | RABGEF1       | Rabex5                                 | 281–439              |
| B                    | BARD1         | BRCA1-associated ring domain protein 1 | 47–284               |
| B                    | GOLGA4        | Golgin A4                              | 1116–1281            |
| B                    | ITSN1         | Intersectin 1                          | 554–667              |
| C                    | SMARCC1       | SWI/SNF complex subunit SMARCC1        | 899–1005             |

\*A–C indicate the confidence level of the interaction from very high to medium.

FIP200, FAK family-interacting protein of 200 kDa; RB1CC1, RB1-inducible coiled-coil protein 1.

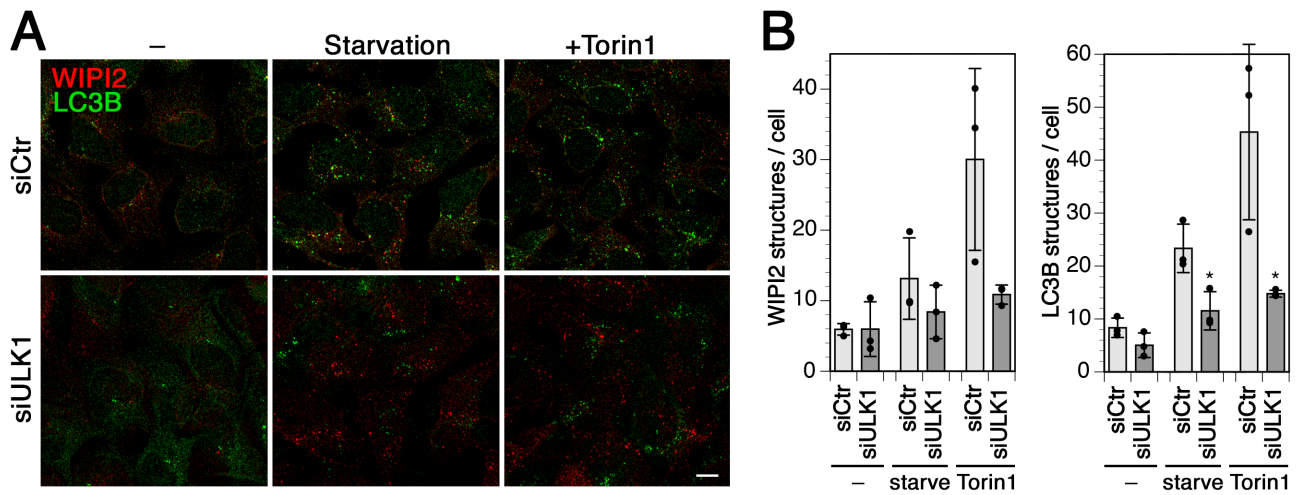

**Appendix Figure S1. ULK1 knockdown inhibits starvation-induced autophagy.**

- A** HEK293A cells were transfected with nontargeting siRNA (siCtr) or siRNA silencing ULK1 for 72 h as in Fig 4C, and treated without (-) or with 250 nM Torin1 for 150 min, or starved in HBSS medium for 150 min. Cells were fixed and immunostained for endogenous WIPI2 and LC3B. Scale bar, 10  $\mu$ m.
- B** WIPI2 or LC3B puncta per cell were quantified for each condition (mean  $\pm$  S.D. of three independent experiments; two-tailed Student's t test: \* $P < 0.05$ ).

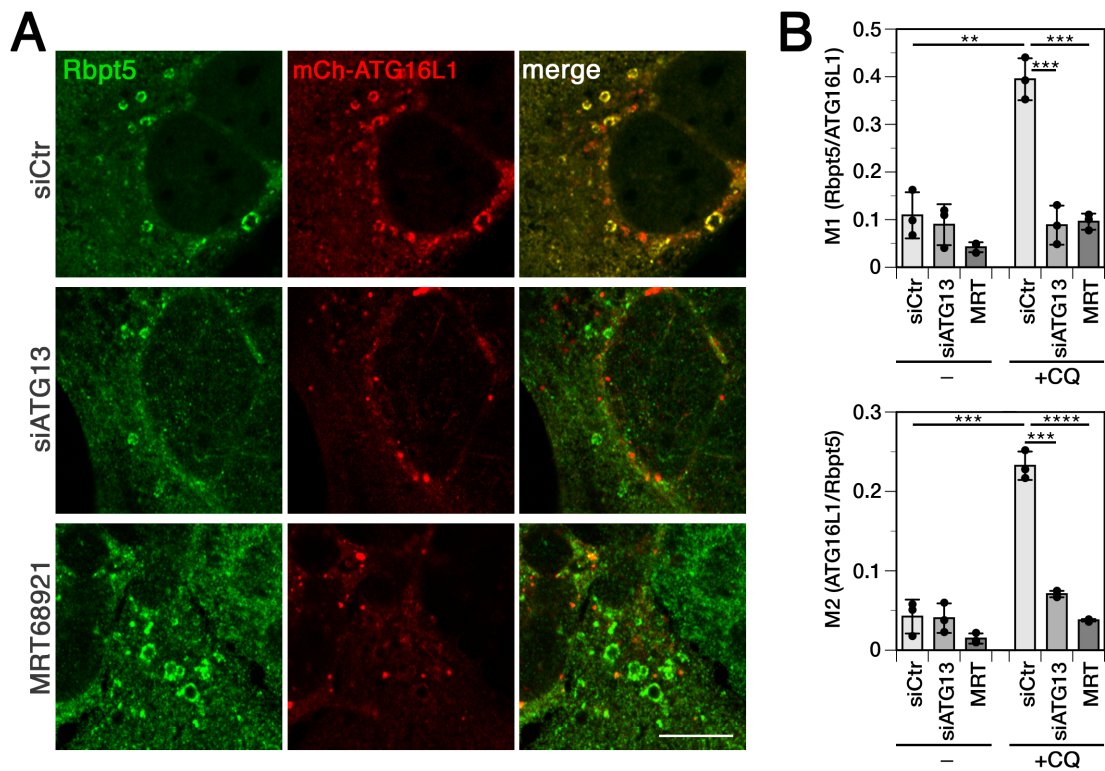

**Appendix Figure S2. Silencing of ATG13 or inhibition of ULK1/2 blocks recruitment of ATG16L1 to Rabaptin5-positive endosomes.**

- A** HEK<sup>+Rbpt5</sup> cells were transfected with nontargeting siRNA (siCtr) or siRNA silencing ATG13 for 72 h and with mCherry-ATG16L1 for 24 h. Cells were treated without (–) or with 60  $\mu$ M chloroquine (+CQ) for 30 min, with or without 5  $\mu$ M of the ULK1/2 inhibitor MRT68921 (MRT) for 60 min, fixed and stained for Rabaptin5 and mCherry-ATG16L1. Fluorescence micrographs of chloroquine-treated cells are shown. Scale bar, 10  $\mu$ m.
- B** Manders' colocalization coefficients were determined for each condition without (–) or with chloroquine (+CQ) or the ULK1/2 inhibitor MRT68921 (MRT), M1 showing the fraction of Rabaptin5-positive structures also positive for mCherry-ATG16L1 and M2 showing the inverse (mean  $\pm$  S.D. of three independent experiments; ANOVA: \*\* $P$ <0.01, \*\*\* $P$ <0.001).

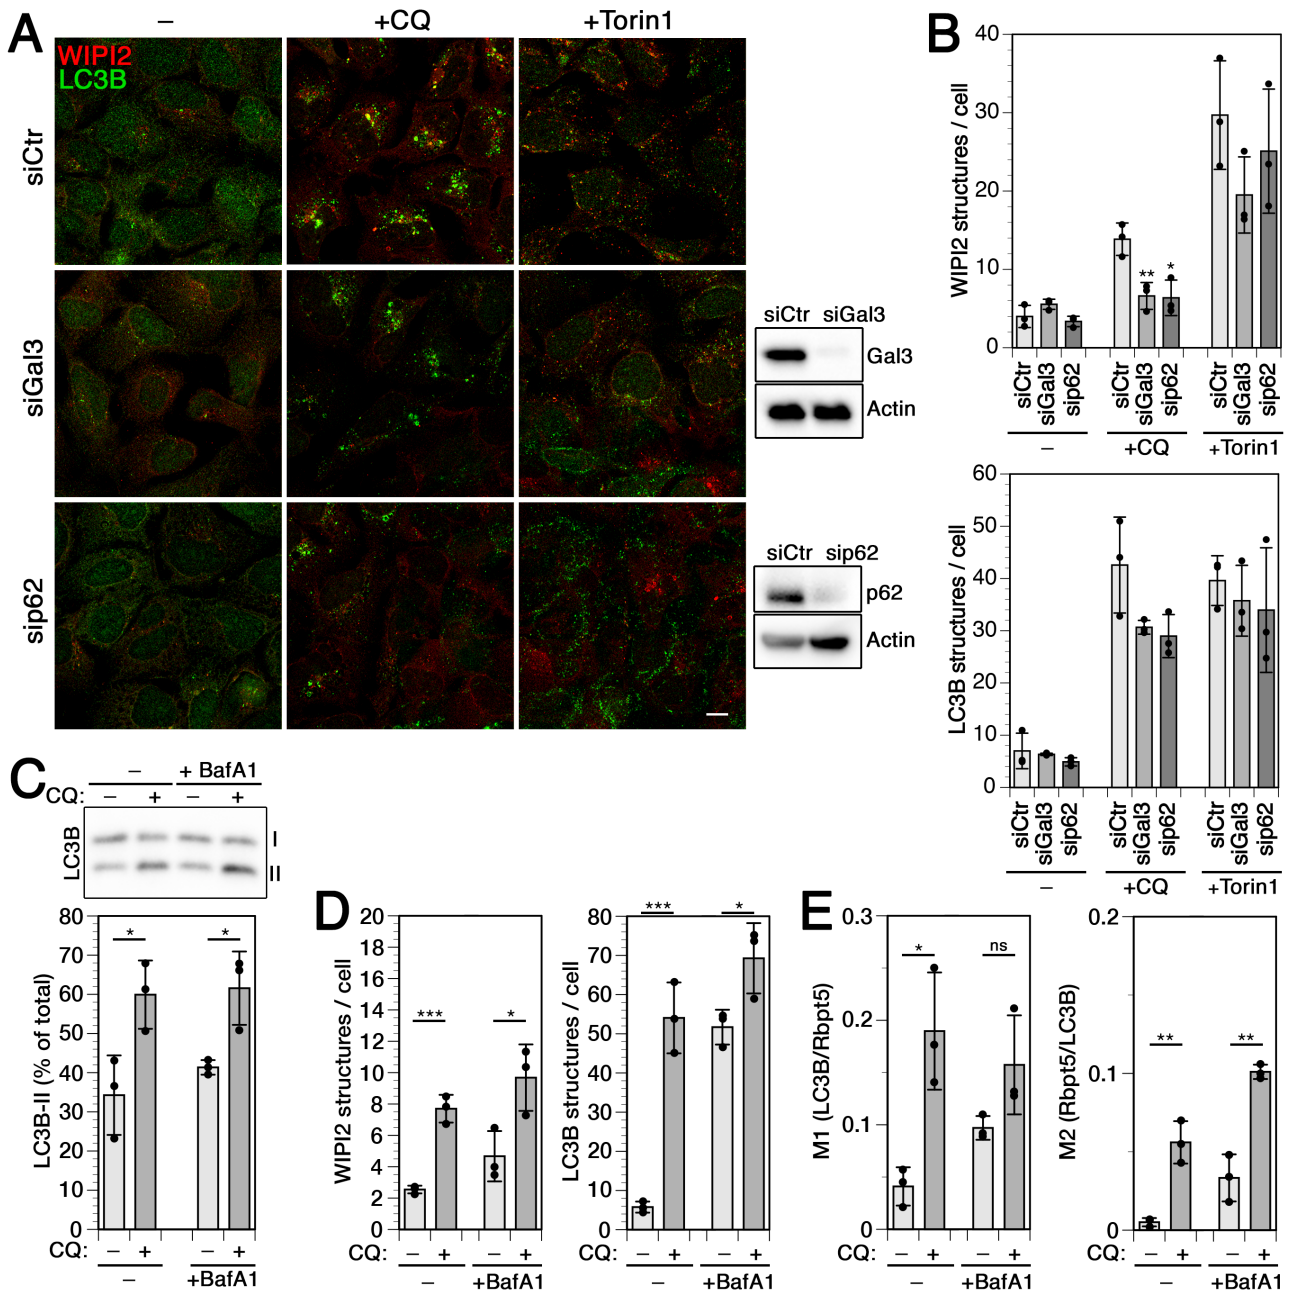

**Appendix Figure S3. Chloroquine-induced autophagy involves galectin3 and p62 and is independent of BafA1.**

- A** HEK293A cells were transfected with nontargeting siRNA (siCtr) or siRNAs silencing galectin3 (siGal3) or p62 (sip62) for 72 h and treated without (–) or with 60  $\mu$ M chloroquine (+CQ) or 250 nM Torin1 for 150 min. Cells were fixed and immunostained for endogenous WIPI2 and LC3B. Scale bar, 10  $\mu$ m. Efficiency of galectin3 and p62 knockdown was assayed by immunoblotting.
- B** WIPI2 or LC3B puncta per cell were quantified for each condition (mean  $\pm$  S.D. of three independent experiments; two-tailed Student's t test: \*P<0.05, \*\*P<0.01).
- C** HEK293A cells were incubated without or with 60  $\mu$ M chloroquine and 500 nM BafA1 for 30 min and non-lipidated and lipidated LC3B (I and II, resp.) were assayed by immunoblot analysis. After longer times of incubation with BafA1 and/or chloroquine, lipidation was too strong to differentiate. The fraction of LC3B-II of total LC3B was quantified (mean  $\pm$  S.D. of three independent experiments; two-tailed Student's t test: \*P<0.05).
- D** HEK293A cells were incubated with or without 60  $\mu$ M chloroquine and/or 500 nM BafA1 for 150 min before immunofluorescence localization of WIPI2, LC3B, or Rabaptin5. WIPI2

(B) or LC3B puncta per cell (C) were quantified for each condition (mean  $\pm$  S.D. of three independent experiments; two-tailed Student's t test: \*P<0.05, \*\*\*P<0.001).

E Manders' colocalization coefficients were determined, M1 showing the fraction of LC3B-positive structures also positive for Rabaptin5 and M2 showing the inverse. The mean  $\pm$  S.D. of three independent experiments is plotted; two-tailed Student's t test: ns not significant, \*P<0.05, \*\*P<0.01).

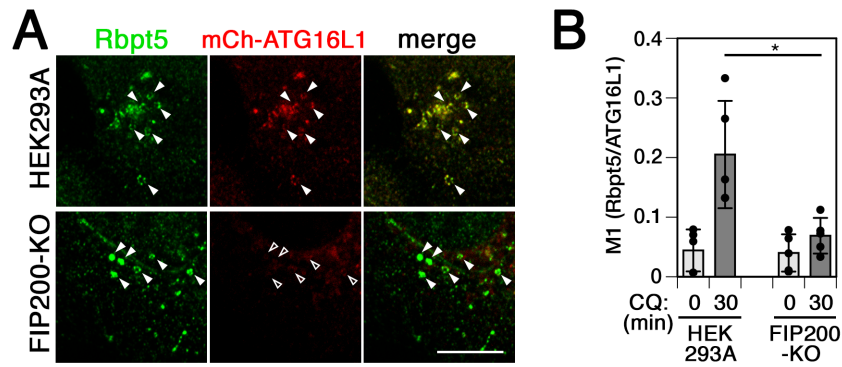

**Appendix Figure S4. ATG16L1 recruitment to chloroquine-damaged endosomes requires FIP200.**

- A Parental HEK293A and FIP200 knockout cells (FIP200-KO) were transfected with mCherry-ATG16L1 for 24 h and incubated with 60  $\mu$ M chloroquine (+CQ) for 30 min and stained for Rabaptin5 and mCherry-ATG16L1. Fluorescence micrographs of chloroquine-treated cells are shown. Scale bar, 10  $\mu$ m. Arrowheads point out chloroquine-induced enlarged Rabaptin5-positive early endosomes (empty arrowheads when negative for mCherry-ATG16L1).
- B Manders' colocalization coefficients were determined with and without chloroquine treatment for 30 min. Mean  $\pm$  S.D. of five independent experiments; ANOVA: \*P<0.05.

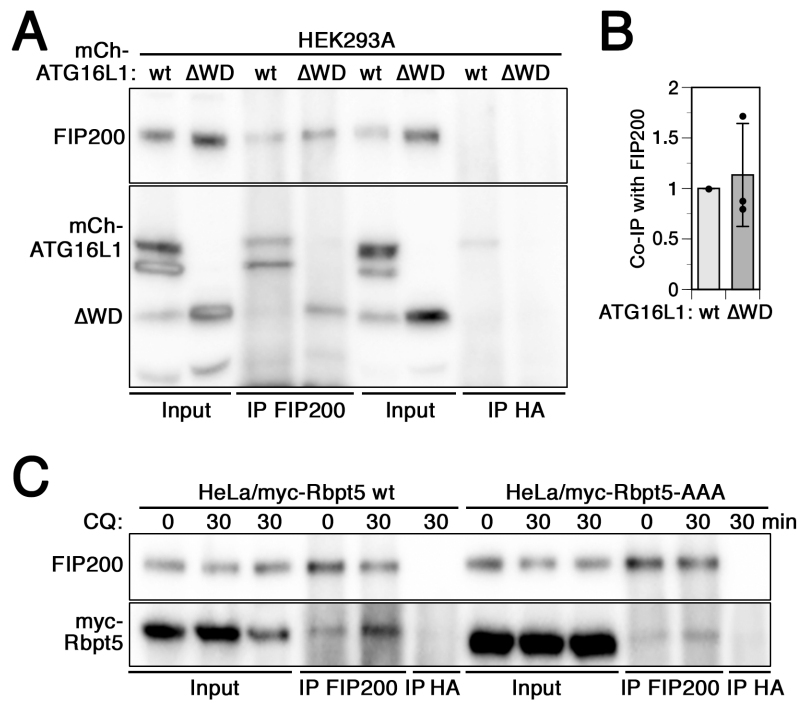

**Appendix Figure S5. Deletion of the WD domain in ATG16L1 and the AAA mutation in Rabaptin5 do not abrogate their interaction with FIP200.**

- A** Lysates of HEK293A cells transiently transfected with full-length mCherry-ATG16L1 (wt) or a mutant lacking the WD domain ( $\Delta$ WD; residues 1–319 of ATG16L1, precisely deleting only the WD40 repeats residues 320–607) were immunoprecipitated with anti-FIP200 or anti-HA antibodies, and immunoblotted for FIP200 and mCherry-ATG16L1.
- B** Immunoblots as in panel A were quantified (signals normalized to immunoprecipitated FIP200; mean  $\pm$  S.D. of three independent experiments each).
- C** HeLa cells transiently transfected with myc-tagged wild-type Rabaptin5 (wt) or triple-alanine mutant (AAA) were incubated for 30 min with or without 60  $\mu$ M chloroquine (CQ), lysed, immunoprecipitated with anti-FIP200 (IP FIP200) or anti-HA antibodies (IP HA), and immunoblotted for FIP200 and myc.



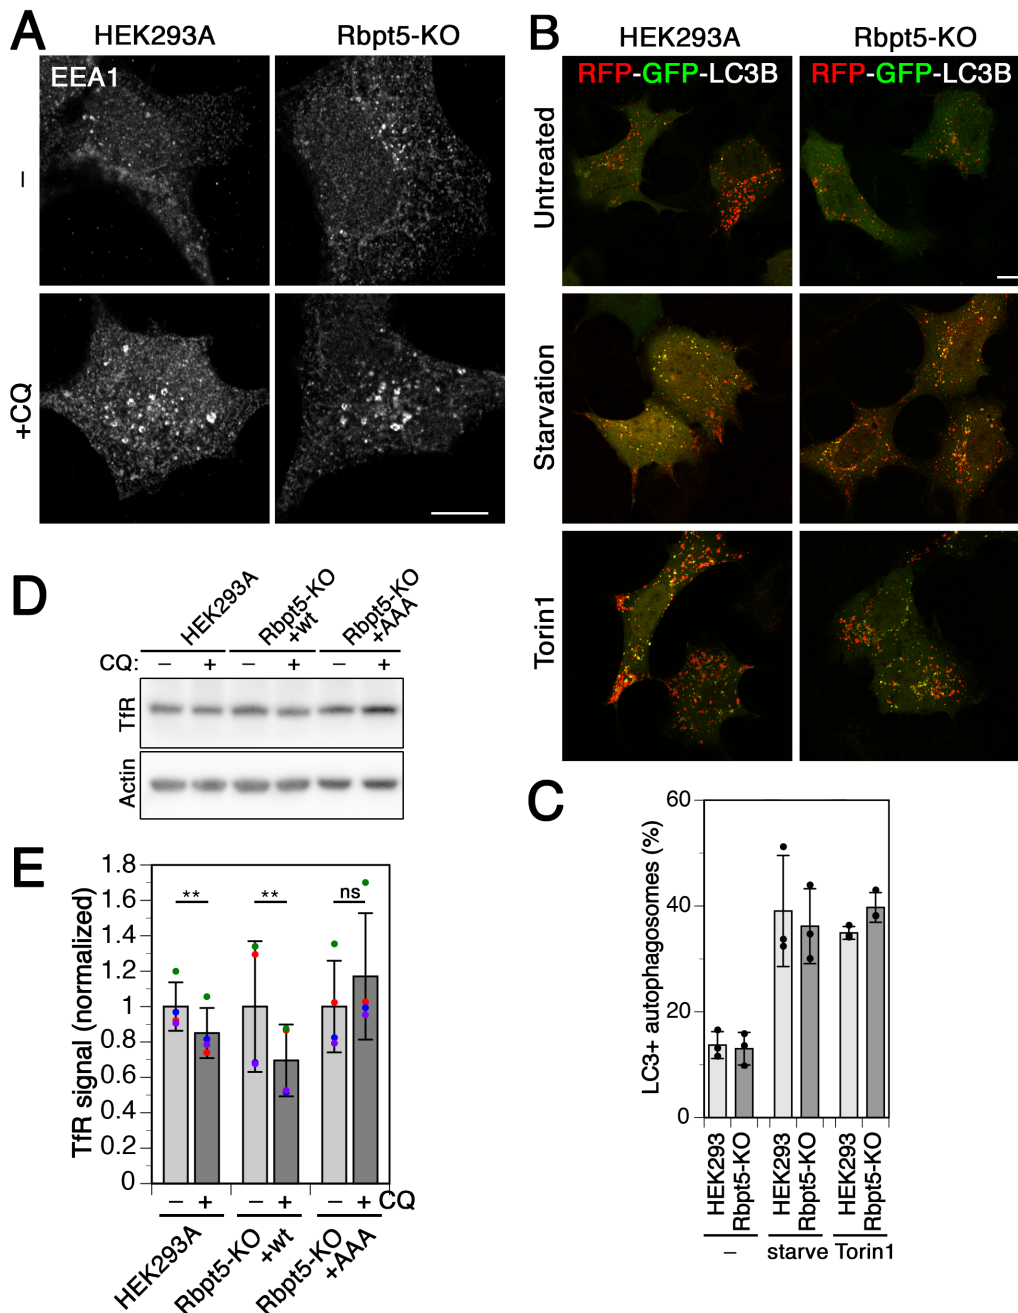

**Appendix Figure S6. Inactivation of Rabaptin5 does not affect autophagic flux, but chloroquine-induced transferrin receptor degradation.**

- A** HEK293A and Rabaptin5-KO cells were treated without and with 60  $\mu$ M chloroquine for 30 min and immunostained for EEA1-positive early endosomes. Endosome swelling is independent of Rabaptin5. Scale bar, 10  $\mu$ m.
- B** HEK293A cells and Rabaptin5-KO cells were transduced to express tandem fluorescent RFP-GFP-LC3, starved in HBSS medium or treated with 250 nM Torin1 for 150 min, fixed and subjected to fluorescence microscopy. Scale bar, 10  $\mu$ m.
- C** The number of autophagosomes (GFP+/RFP+) and autolysosomes (GFP-/RFP+) were counted and autophagosomes plotted as a percentage of the total (mean  $\pm$  S.D. of three independent experiments quantifying at least 16 cells per condition).
- D** The indicated cell lines were incubated with or without 60  $\mu$ M chloroquine (CQ) overnight before immunoblot analysis for (TfR) and actin.

E The transferrin receptor signal of immunoblots as in panel D was quantified and normalized to actin. The mean  $\pm$  S.D. of four independent experiments (indicated by colors) is shown; two-tailed, paired Student's t test: ns not significant, \*\*P<0.01).
